# Supplementary material for: Radiotherapy or Surgery? Comparative, Qualitative Assessment of Online Patient Education Materials on Prostate Cancer
Source: MDPI journal article supplement (doi:10.3390/curroncol28050296), 2021-09-06
Supplement: s1 [file s1]

**Supplementary text box:** Key words used for video search on YouTube

|              |                                                                                                                                                                                                                                                                                                                                |
|--------------|--------------------------------------------------------------------------------------------------------------------------------------------------------------------------------------------------------------------------------------------------------------------------------------------------------------------------------|
| Radiotherapy | <ul style="list-style-type: none"><li>• Prostate cancer therapy</li><li>• Prostate cancer treatment</li><li>• Prostate cancer radiotherapy</li><li>• Prostate cancer external radiotherapy</li><li>• Prostate cancer brachytherapy</li><li>• External beam radiation therapy</li><li>• EBRT</li></ul>                          |
| Surgery      | <ul style="list-style-type: none"><li>• Prostate cancer therapy</li><li>• Prostate cancer treatment</li><li>• Prostate cancer surgery</li><li>• Da Vinci surgery prostate cancer</li><li>• Robotic surgery prostate cancer</li><li>• Open surgery prostate cancer</li><li>• Minimal invasive surgery prostate cancer</li></ul> |
